# Supplementary material
Source: publisher figshare collection journal article supplement (https://acs.figshare.com/ndownloader/files/4855912)
Supplement: Supplementary file 1 [file 4855912]

Compound	SMILE	TLR8 Agonistic Activity (nM)	Maximal Response (Absorbance Units)
4	NC1=NC=CN1CCCCC.Cl	28.4	1.2
7	NC1=NC=C(C2=CC=CC=C2)N1CCCCC.Cl	Inactive
10	NC1=NC(C2=CC=CC=C2)=C(C3=CC=CC=C3)N1CCCCC.Cl	Very low AUC	0.52
17a	NC1=NC(C2=CC=CC=C2)=CN1CCCCC.Cl	2.48	2
17b	CC(C=CC=C1)=C1C2=CN(CCCCC)C(N)=N2.Cl	2.5	1.4
17c	CCC(C=CC=C1)=C1C2=CN(CCCCC)C(N)=N2.Cl	2.5 (Low AUC)	0.8
17d	CC1=CC=CC(C2=CN(CCCCC)C(N)=N2)=C1.Cl	2	1
17e	CC(C=C1)=CC=C1C2=CN(CCCCC)C(N)=N2.Cl	2.5 (Low AUC)	0.9
17f	CC(C(C)=CC=C1)=C1C2=CN(CCCCC)C(N)=N2.Cl	1.5	1.3
17g	CC(C=C1)=CC(C)=C1C2=CN(CCCCC)C(N)=N2.Cl	1.5	1.2
17h	CC(C=CC(C)=C1)=C1C2=CN(CCCCC)C(N)=N2.Cl	1.5 (Low AUC)	0.9
17i	CC(C=CC=C1C)=C1C2=CN(CCCCC)C(N)=N2.Cl	2.5	1.2
18a	NC1=NC(CC2=CC=CC=C2)=CN1CCCCC.Cl	2.7	1
18b	NC1=NC(CCC2=CC=CC=C2)=CN1CCCCC.Cl	1.8 (Low AUC)	0.9
18c	NC1=NC(C2=C(C=CC=C3)C3=CC=C2)=CN1CCCCC.Cl	1.5 (Low AUC)	0.9
18d	NC1=NC(C2=CC(C=CC=C3)=C3C=C2)=CN1CCCCC.Cl	Very low AUC	0.42
18e	NC1=NC(C2=CC=C(C3=CC=CC=C3)C=C2)=CN1CCCCC.Cl	Very low AUC	0.47
18f	NC1=NC(C2=C(OCC3=CC=CC=C3)C=CC=C2)=CN1CCCCC.Cl	Inactive
19a	NC1=NC(C2=CN=CC=C2)=CN1CCCCC.Cl	21.31	1.8
19b	CC1=NOC(C)=C1C2=CN(CCCCC)C(N)=N2.Cl	18.8 (Low AUC)	0.7
19c	OC(C=CC=C1)=C1C2=CN(CCCCC)C(N)=N2.Cl	5.1 (Low AUC)	0.9
19d	OCC(C=CC=C1)=C1C2=CN(CCCCC)C(N)=N2.Cl	8.05	1.6
19e	NC(C=C1)=CC=C1C2=CN(CCCCC)C(N)=N2.Cl	8 (Very low AUC)	0.6
19f	O=C(N)C(C=C1)=CC=C1C2=CN(CCCCC)C(N)=N2.Cl	20.24 (Low AUC)	0.8
19g	NC1=NC(C2=CC=C(C(OC)=O)C=C2)=CN1CCCCC.Cl	4.04 (Low AUC)	0.7
19h	NC1=NC(C2=C(C(OC)=O)C=CC=C2)=CN1CCCCC.Cl	11.1	1.2
20a	COC(C=CC=C1)=C1C2=CN(CCCCC)C(N)=N2.Cl	1.6	1.6
20b	COC1=CC=CC(C2=CN(CCCCC)C(N)=N2)=C1.Cl	2.2	1.2
20c	COC(C=C1)=CC=C1C2=CN(CCCCC)C(N)=N2.Cl	2.94 (Low AUC)	0.7
20d	CC(C=C(OC)C=C1)=C1C2=CN(CCCCC)C(N)=N2.Cl	1.5 (Low AUC)	0.9
20e	CC1=CC=CC(C2=CN(CCCCC)C(N)=N2)=C1OC.Cl	1.5 (Low AUC)	0.7
20f	COC1=CC=CC(C2=CN(CCCCC)C(N)=N2)=C1OC.Cl	2.5 (Very low AUC)	0.6
20g	NC1=NC(C2=CC(OC)=C(OC)C(OC)=C2)=CN1CCCCC.Cl	3.08 (Low AUC)	0.8
21a	ClC(C=CC=C1)=C1C2=CN(CCCCC)C(N)=N2.Cl	1.36	1
21b	ClC1=CC=CC(C2=CN(CCCCC)C(N)=N2)=C1.Cl	1.93 (Low AUC)	0.9
21c	ClC(C=C1)=CC=C1C2=CN(CCCCC)C(N)=N2.Cl	6.83 (Very low AUC)	0.5
21d	FC(C=CC=C1)=C1C2=CN(CCCCC)C(N)=N2.Cl	2.35	1.4
21e	FC1=CC=CC(C2=CN(CCCCC)C(N)=N2)=C1.Cl	2.57	1.6
21f	FC(C=C1)=CC=C1C2=CN(CCCCC)C(N)=N2.Cl	1.96	2
21g	CC(C=C(F)C=C1)=C1C2=CN(CCCCC)C(N)=N2.Cl	2.01	1.7
21h	NC1=NC(C2=C(C(F)(F)F)C=CC=C2)=CN1CCCCC.Cl	1.64 (Low AUC)	0.9
21i	NC1=NC(C2=CC(C(F)(F)F)=CC=C2)=CN1CCCCC.Cl	1.98 (Very low AUC)	0.6
21j	NC1=NC(C2=CC=C(C(F)(F)F)C=C2)=CN1CCCCC.Cl	2.48 (Low AUC)	0.8
